# Supplementary material for: Hedysarum multijugum Maxim treats ulcerative colitis through the PI3K-AKT and TNF signaling pathway according to network pharmacology and molecular docking
Source: PubMed Central journal article supplement — Ann Transl Med. 2022 Oct;10(20):1132. doi: 10.21037/atm-22-4815 (PMC9652569; doi:10.21037/atm-22-4815), 2022-10
Supplement: atm-10-20-1132-supplementary.pdf [file atm-10-20-1132-supplementary.pdf]

Table S1 Active ingredients of HMM

| Mol ID    | Molecule Name                                                                                                                                             | OB(%)  | DL   |
|-----------|-----------------------------------------------------------------------------------------------------------------------------------------------------------|--------|------|
| MOL000211 | Mairin                                                                                                                                                    | 55.38  | 0.78 |
| MOL000239 | Jaranol                                                                                                                                                   | 50.83  | 0.29 |
| MOL000296 | hederagenin                                                                                                                                               | 36.91  | 0.75 |
| MOL000033 | (3S,8S,9S,10R,13R,14S,17R)-10,13-dimethyl-17-[(2R,5S)-5-propan-2-yloctan-2-yl]-2,3,4,7,8,9,11,12,14,15,16,17-dodecahydro-1H-cyclopenta[a]phenanthren-3-ol | 36.23  | 0.78 |
| MOL000354 | isorhamnetin                                                                                                                                              | 49.6   | 0.31 |
| MOL000371 | 3,9-di-O-methylnissolin                                                                                                                                   | 53.74  | 0.48 |
| MOL000374 | 5'-hydroxyiso-muronulatol-2',5'-di-O-glucoside                                                                                                            | 41.72  | 0.69 |
| MOL000378 | 7-O-methylisomucronulatol                                                                                                                                 | 74.69  | 0.3  |
| MOL000379 | 9,10-dimethoxypterocarpan-3-O- $\beta$ -D-glucoside                                                                                                       | 36.74  | 0.92 |
| MOL000380 | (6aR,11aR)-9,10-dimethoxy-6a,11a-dihydro-6H-benzofurano[3,2-c]chromen-3-ol                                                                                | 64.26  | 0.42 |
| MOL000387 | Bifendate                                                                                                                                                 | 31.1   | 0.67 |
| MOL000392 | formononetin                                                                                                                                              | 69.67  | 0.21 |
| MOL000398 | isoflavanone                                                                                                                                              | 109.99 | 0.3  |
| MOL000417 | Calycosin                                                                                                                                                 | 47.75  | 0.24 |
| MOL000422 | kaempferol                                                                                                                                                | 41.88  | 0.24 |
| MOL000433 | FA                                                                                                                                                        | 68.96  | 0.71 |
| MOL000438 | (3R)-3-(2-hydroxy-3,4-dimethoxyphenyl)chroman-7-ol                                                                                                        | 67.67  | 0.26 |
| MOL000439 | isomucronulatol-7,2'-di-O-glucoside                                                                                                                       | 49.28  | 0.62 |
| MOL000442 | 1,7-Dihydroxy-3,9-dimethoxy pterocarpene                                                                                                                  | 39.05  | 0.48 |
| MOL000098 | quercetin                                                                                                                                                 | 46.43  | 0.28 |



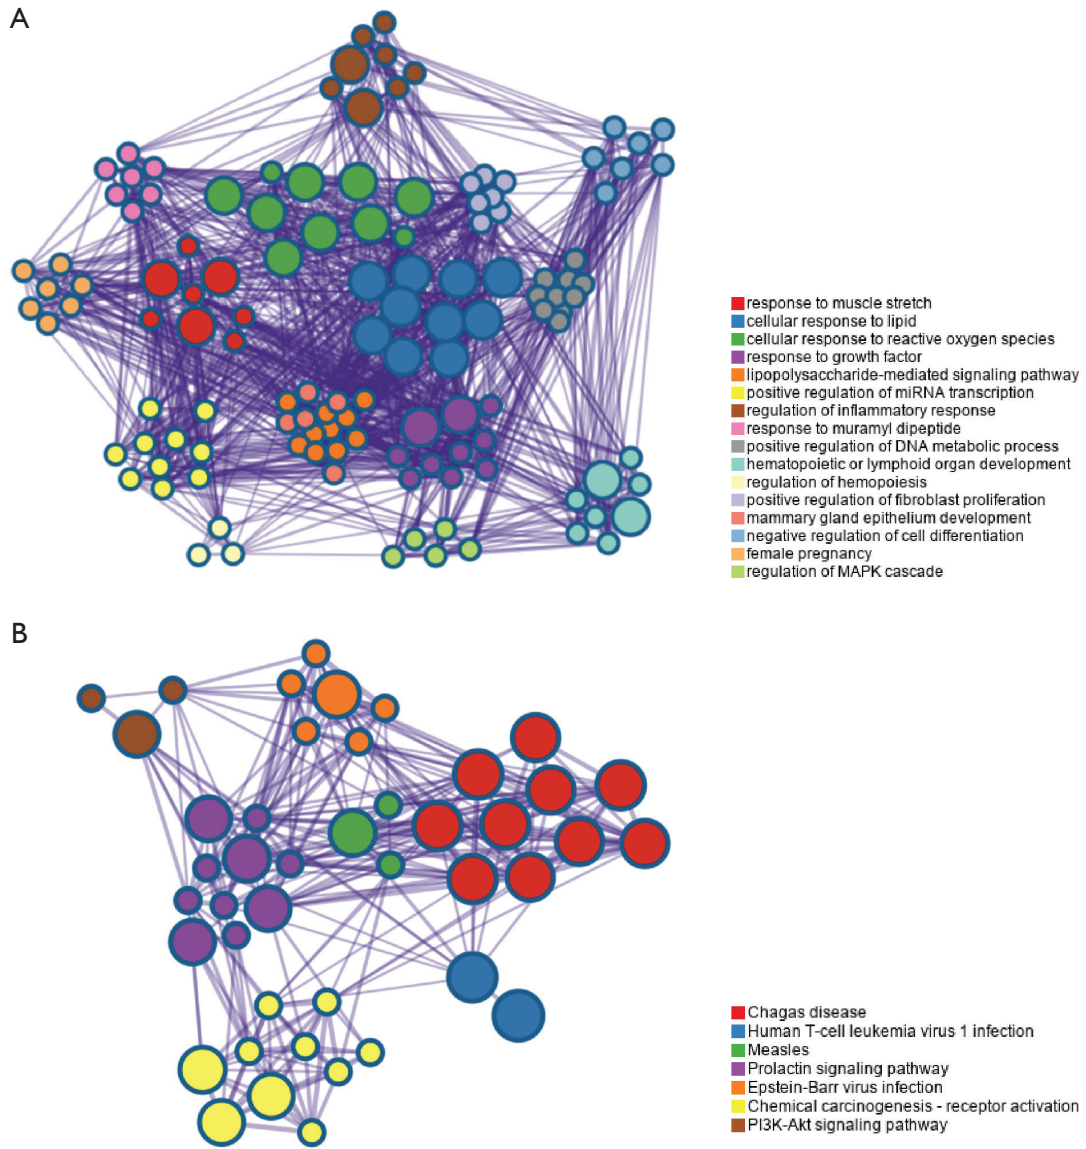

**Figure S2** Functional analysis for hub genes. (A) GO analysis for hub genes, (B) KEGG analysis for hub genes, and different color was used to represent cluster annotations.
